# Supplementary material
Source: publisher site journal article supplement (https://www.dovepress.com/article/486695)
Supplement: Supplementary file 1 [file 486695-Supplementary-Table-1.docx]

**Supplementary Table 1. UA/SCr Ratio and Euthyroid Function in GDM and NGT Group Based on BMI**

| Variables | TSH(uIU/mL) | FT4(ng/dL) | UA/SCr ratio |
| --- | --- | --- | --- |
| PreBMI-quartile 1 |  |  |  |
| GDM | 1.53(1.21-2.15) | 1.24(1.10-1.46) | 4.25(3.54-5.00) |
| NGT | 1.51(0.92-2.49) | 1.25(1.11-1.41) | 4.15(3.7-4.69) |
| MD, P value | 0.288,0.940 | 0.542,0.704 | 0.041,0.848 |
| PreBMI-quartile 2 |  |  |  |
| GDM | 1.88(1.00-2.76) | 1.24(1.13-1.48) | 4.14(3.58-5.15) |
| NGT | 1.58(0.99-2.26) | 1.22(1.06-1.39) | 4.28(3.79-4.99) |
| MD, P value | -0.21,0.382 | 0.06,0.940 | 0.049,0.78 |
| PreBMI-quartile 3 |  |  |  |
| GDM | 1.87(1.46-2.40) | 1.17(1.10-1.40) | 4.76(4.16-5.35) |
| NGT | 1.62(0.94-2.41) | 1.19(1.06-1.34) | 4.44(3.76-5.20) |
| MD, P value | -0.24,0.28 | 0.009,0.868 | -0.197,0.304 |
| PreBMI-quartile 4 |  |  |  |
| GDM | 1.69(1.10-2.47) | 1.13(1.02-1.28) | 5.22(4.47-5.87) |
| NGT | 1.80(1.17-2.53) | 1.18(1.07-1.32) | 4.87(4.05-5.61) |
| MD, P value | -0.37,0.847 | 0.14,0.02 | -0.52,0.04 |

Variables were presented as median(interquartile range).

Abbreviations: UA, serum uric acid; SCr, serum uric creatine; GDM, gestational diabetes mellitus; NGT, normal glucose tolerance; preBMI, pre-pregnancy BMI; FT4, free thyroxine; TSH, Thyroid Stimulating Hormone; MD, mean difference.
